# Supplementary material for: A bismuth silver pnictohalide alternative to perovskite in fully-printable triple-mesoscopic solar cells
Source: Royal Society of Chemistry journal article supplement (doi:10.1039/d2se01324j), 2023-01-01
Supplement: d2se01324j1.pdf [file d2se01324j1.pdf]

Electronic Supplementary Material (ESI):

# Bismuth Silver Pnictohalide Alternative to Perovskite in Fully-Printable Triple-Mesoscopic Solar Cells

Ying Yuan, and Neil Robertson

School of Chemistry and EaStCHEM, University of Edinburgh, King's Buildings,  
David Brewster Road, Edinburgh, Scotland EH9 3FJ. E-mail: s1779788@ed.ac.uk;  
neil.robertson@ed.ac.uk

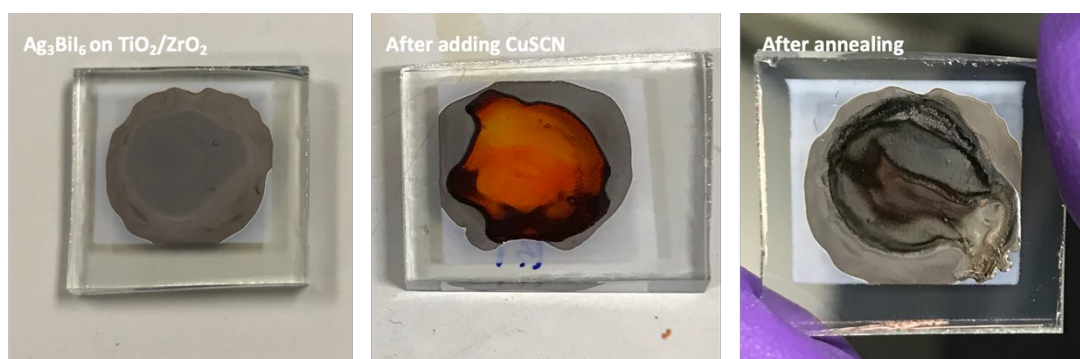

**Figure S1** Digital pictures of Ag<sub>3</sub>BiI<sub>6</sub> on TiO<sub>2</sub>/ZrO<sub>2</sub> changes with adding CuSCN.

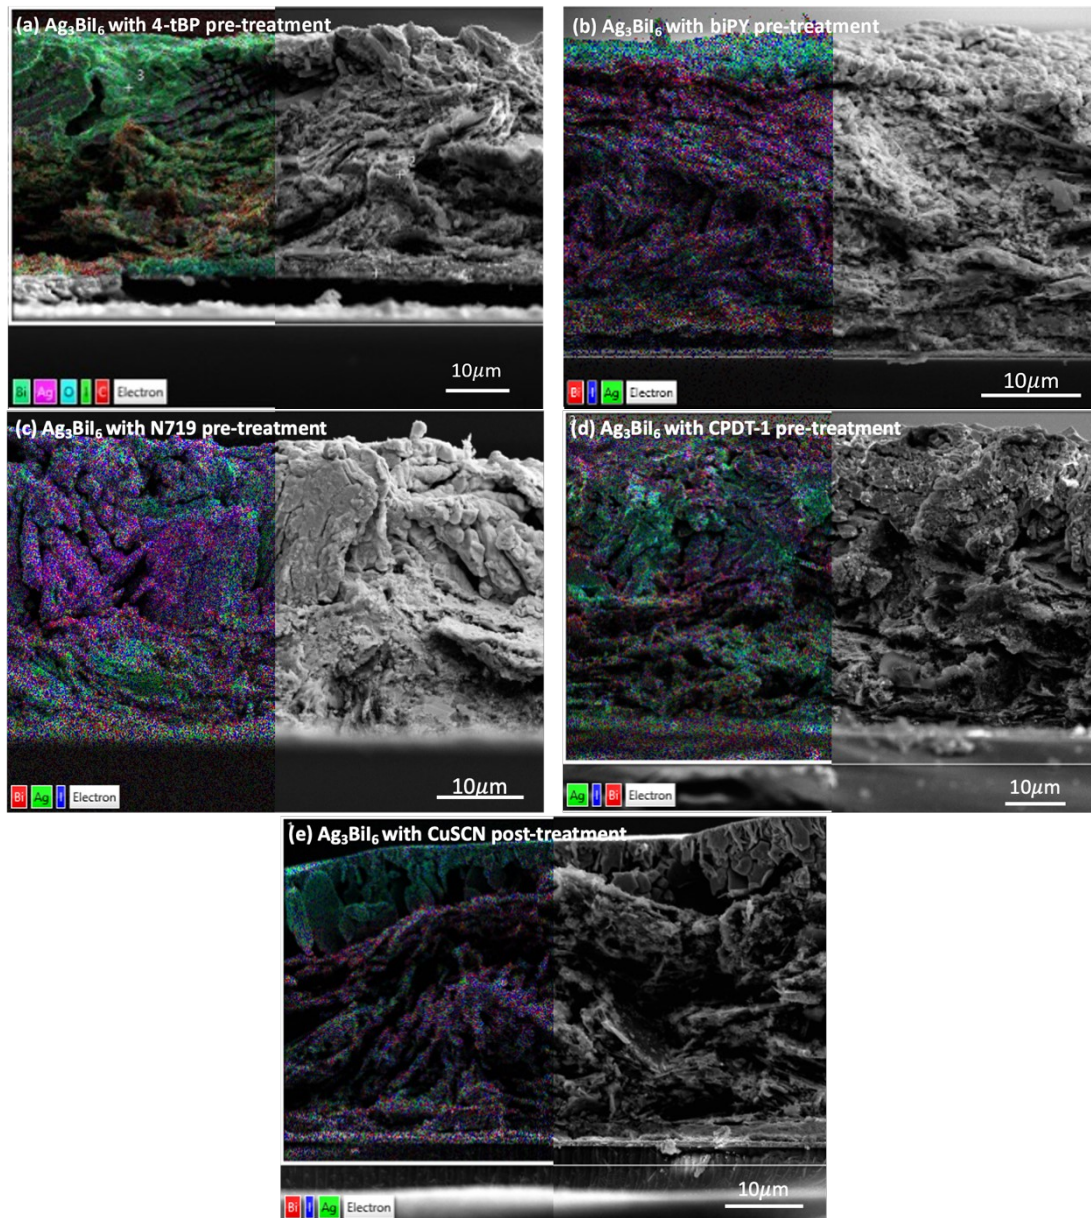

**Figure S2** Cross-sectional EDS layered image of  $\text{Ag}_3\text{BiI}_6$  with pre-treatment: (a) 4tBP, (b) biPY, (c) N719, (d) CPDT-1; and post-treatment: (e) CuSCN.

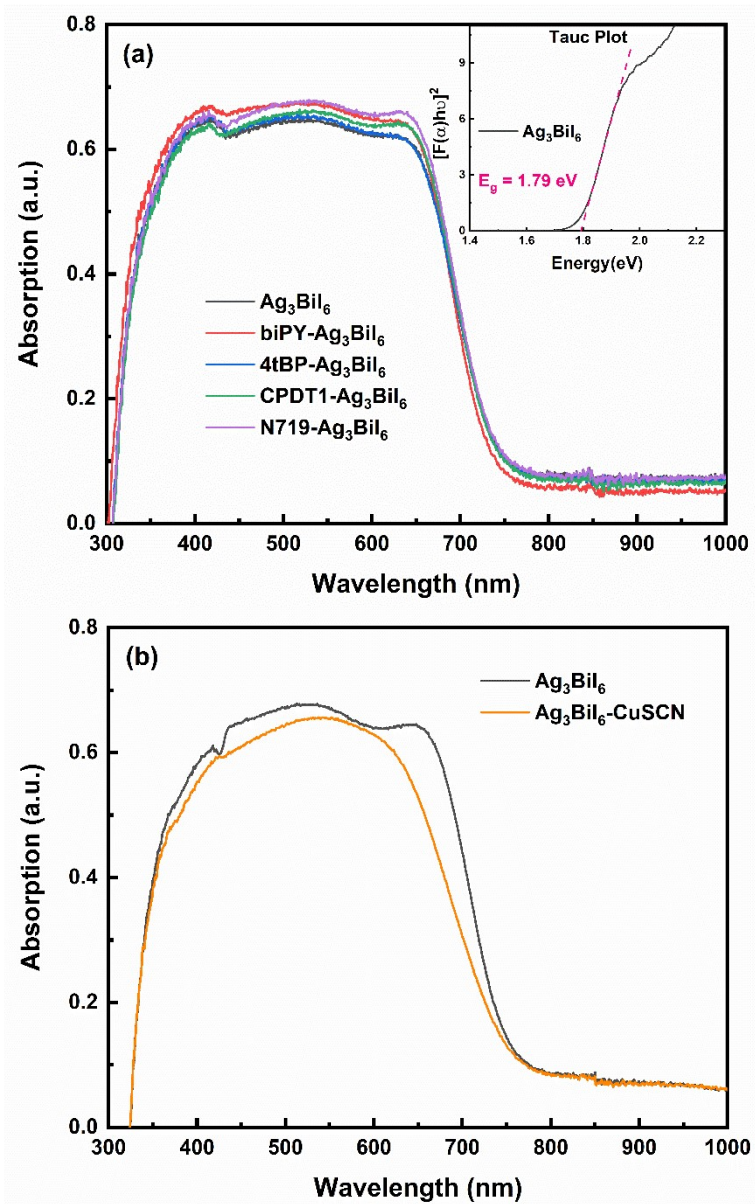

**Figure S3** Absorption spectra of solid-state  $\text{Ag}_3\text{BiI}_6$  with (a) pre-treatment and (b) post-treatment. Tauc-plot of the  $\text{Ag}_3\text{BiI}_6$  is inserted in (a).

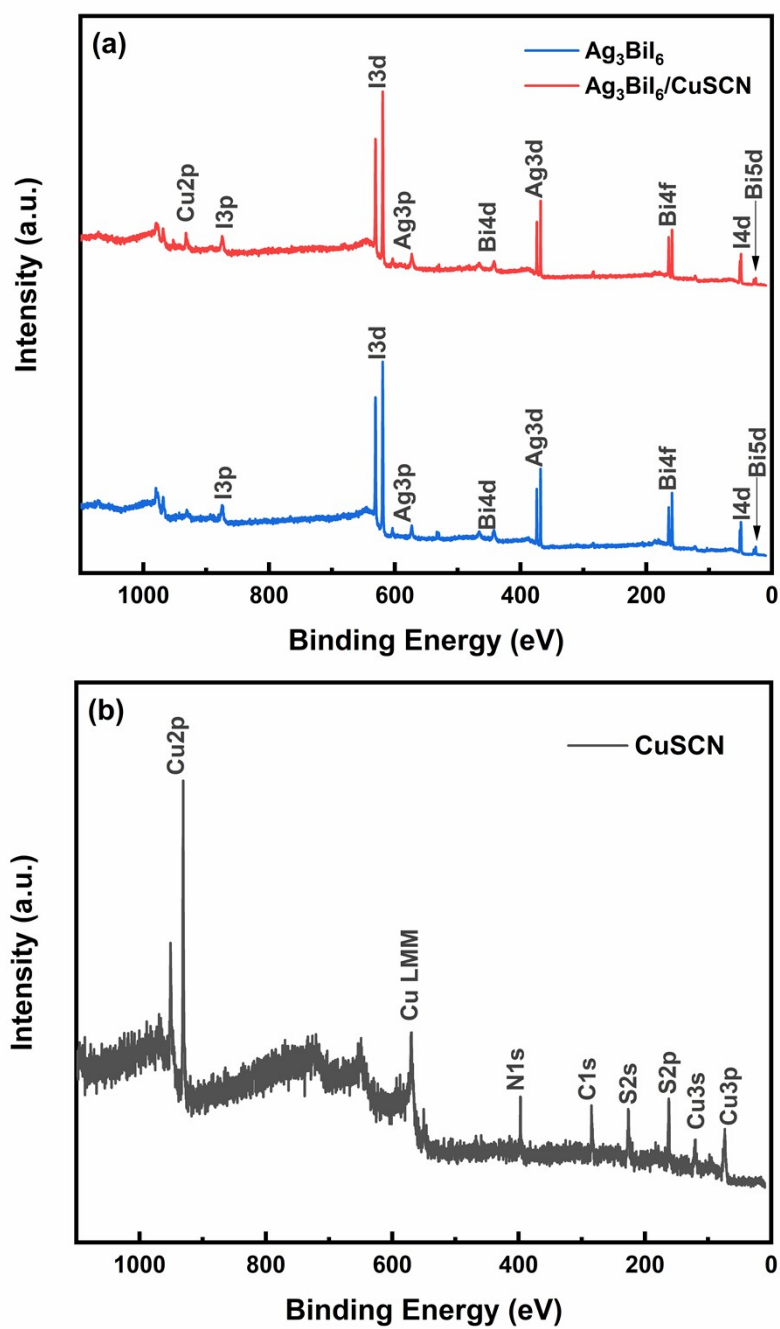

**Figure S4** XPS survey spectra of (a)  $\text{Ag}_3\text{BiI}_6$  (red) and  $\text{Ag}_3\text{BiI}_6/\text{CuSCN}$  (blue) films; and (b) CuSCN.

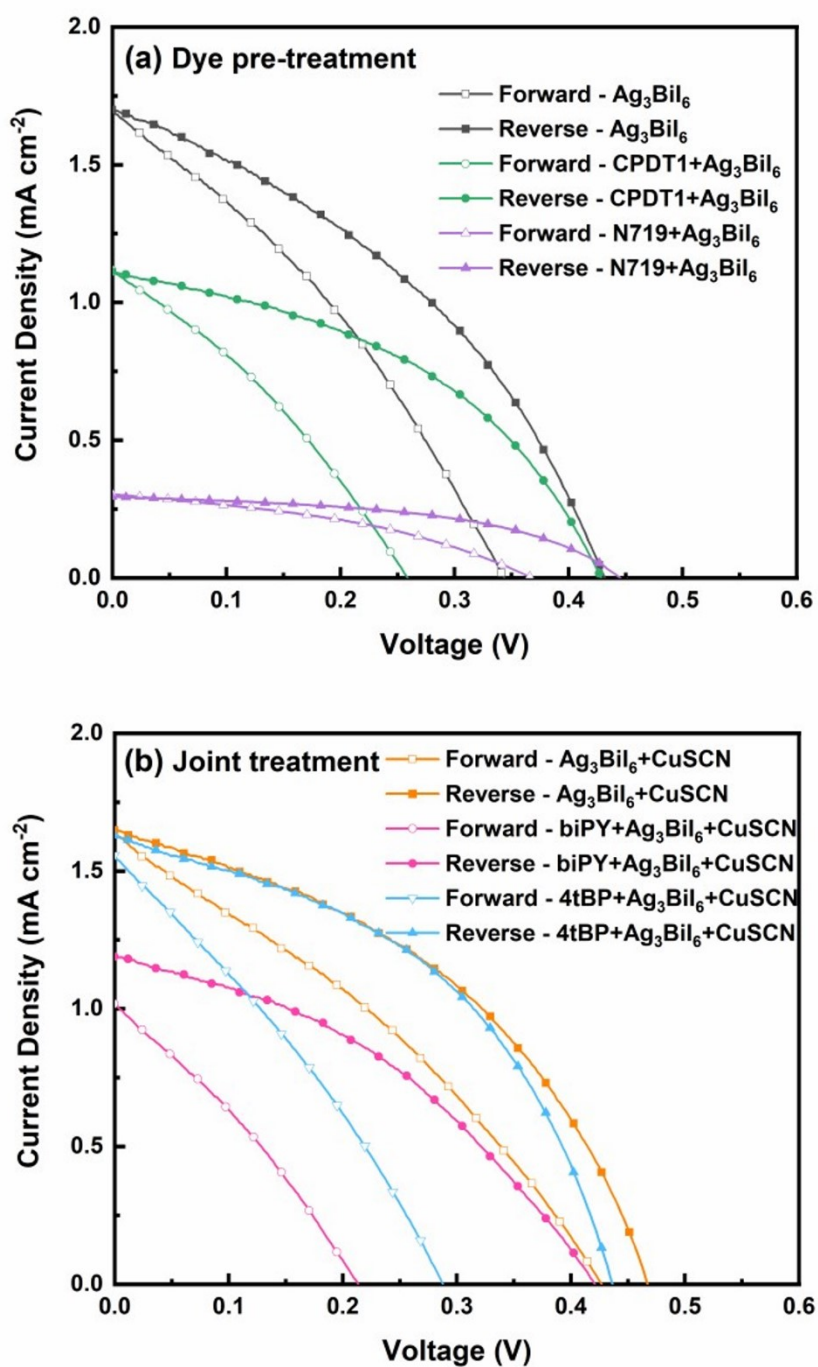

**Figure S5** J-V curves of as-prepared  $\text{Ag}_3\text{Bil}_6$  devices with (a) dye molecules and (b) joint-treatment.

**Table S1** J-V characteristics of as-prepared  $\text{Ag}_3\text{BiI}_6$  in TM-SCs based on different pre-treatments, CuSCN post-treatment and joint-treatments.

| Device                                           | Scan    | $J_{sc}$ [ $\text{mA}\cdot\text{cm}^{-2}$ ] | $V_{oc}$ [V]       | $FF$               | PCE [%]            | HI*           |
|--------------------------------------------------|---------|---------------------------------------------|--------------------|--------------------|--------------------|---------------|
| <b><math>\text{Ag}_3\text{BiI}_6</math> only</b> | Forward | 1.69 (1.48 ± 0.28)                          | 0.34 (0.34 ± 0.02) | 0.33 (0.31 ± 0.02) | 0.19 (0.16 ± 0.04) | 0.32          |
|                                                  | Reverse | 1.69 (1.50 ± 0.28)                          | 0.43 (0.42 ± 0.02) | 0.39 (0.36 ± 0.03) | 0.28 (0.24 ± 0.06) | (0.32 ± 0.04) |
| <b>Pre-biPY</b>                                  | Forward | 1.12 (1.06 ± 0.16)                          | 0.45 (0.44 ± 0.02) | 0.32 (0.31 ± 0.04) | 0.16 (0.14 ± 0.04) | 0.39          |
|                                                  | Reverse | 1.05 (0.99 ± 0.12)                          | 0.48 (0.48 ± 0.01) | 0.53 (0.49 ± 0.04) | 0.27 (0.23 ± 0.02) | (0.38 ± 0.13) |
| <b>Pre-4tBP</b>                                  | Forward | 1.22 (1.16 ± 0.20)                          | 0.36 (0.36 ± 0.04) | 0.33 (0.32 ± 0.04) | 0.14 (0.13 ± 0.03) | 0.55          |
|                                                  | Reverse | 1.34 (1.23 ± 0.28)                          | 0.44 (0.44 ± 0.01) | 0.53 (0.46 ± 0.07) | 0.32 (0.24 ± 0.05) | (0.44 ± 0.14) |
| <b>Pre-CPDT-1</b>                                | Forward | 1.11 (0.49 ± 0.39)                          | 0.26 (0.31 ± 0.07) | 0.32 (0.30 ± 0.06) | 0.09 (0.04 ± 0.03) | 0.56          |
|                                                  | Reverse | 1.11 (0.51 ± 0.40)                          | 0.43 (0.44 ± 0.01) | 0.44 (0.40 ± 0.05) | 0.21 (0.09 ± 0.07) | (0.46 ± 0.20) |
| <b>Pre-N719</b>                                  | Forward | 0.30 (0.18 ± 0.07)                          | 0.37 (0.37 ± 0.02) | 0.52 (0.38 ± 0.04) | 0.04 (0.03 ± 0.01) | 0.33          |
|                                                  | Reverse | 0.29 (0.18 ± 0.07)                          | 0.44 (0.44 ± 0.01) | 0.50 (0.48 ± 0.04) | 0.06 (0.04 ± 0.02) | (0.31 ± 0.02) |
| <b>Post-CuSCN</b>                                | Forward | 1.63 (1.47 ± 0.21)                          | 0.43 (0.40 ± 0.02) | 0.32 (0.34 ± 0.05) | 0.22 (0.20 ± 0.04) | 0.31          |
|                                                  | Reverse | 1.65 (1.46 ± 0.21)                          | 0.47 (0.46 ± 0.01) | 0.42 (0.43 ± 0.04) | 0.33 (0.29 ± 0.05) | (0.30 ± 0.06) |
| <b>biPY/CuSCN</b>                                | Forward | 1.06 (0.91 ± 0.13)                          | 0.23 (0.25 ± 0.03) | 0.30 (0.29 ± 0.01) | 0.07 (0.07 ± 0.01) | 0.64          |
|                                                  | Reverse | 1.21 (1.05 ± 0.15)                          | 0.42 (0.42 ± 0.01) | 0.38 (0.39 ± 0.02) | 0.20 (0.17 ± 0.03) | (0.61 ± 0.05) |
| <b>4tBP/CuSCN</b>                                | Forward | 1.54 (1.10 ± 0.30)                          | 0.29 (0.28 ± 0.01) | 0.30 (0.28 ± 0.02) | 0.13 (0.09 ± 0.03) | 0.58          |
|                                                  | Reverse | 1.63 (1.23 ± 0.26)                          | 0.43 (0.42 ± 0.02) | 0.45 (0.40 ± 0.03) | 0.32 (0.21 ± 0.07) | (0.59 ± 0.02) |

\*HI: Hysteresis index.

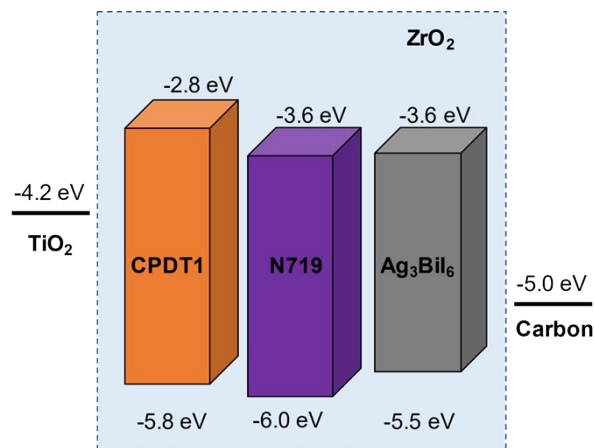

**Figure S6** Energy level alignment diagram of CPDT-1, N719 and  $\text{Ag}_3\text{BiI}_6$  in TM-SCs.

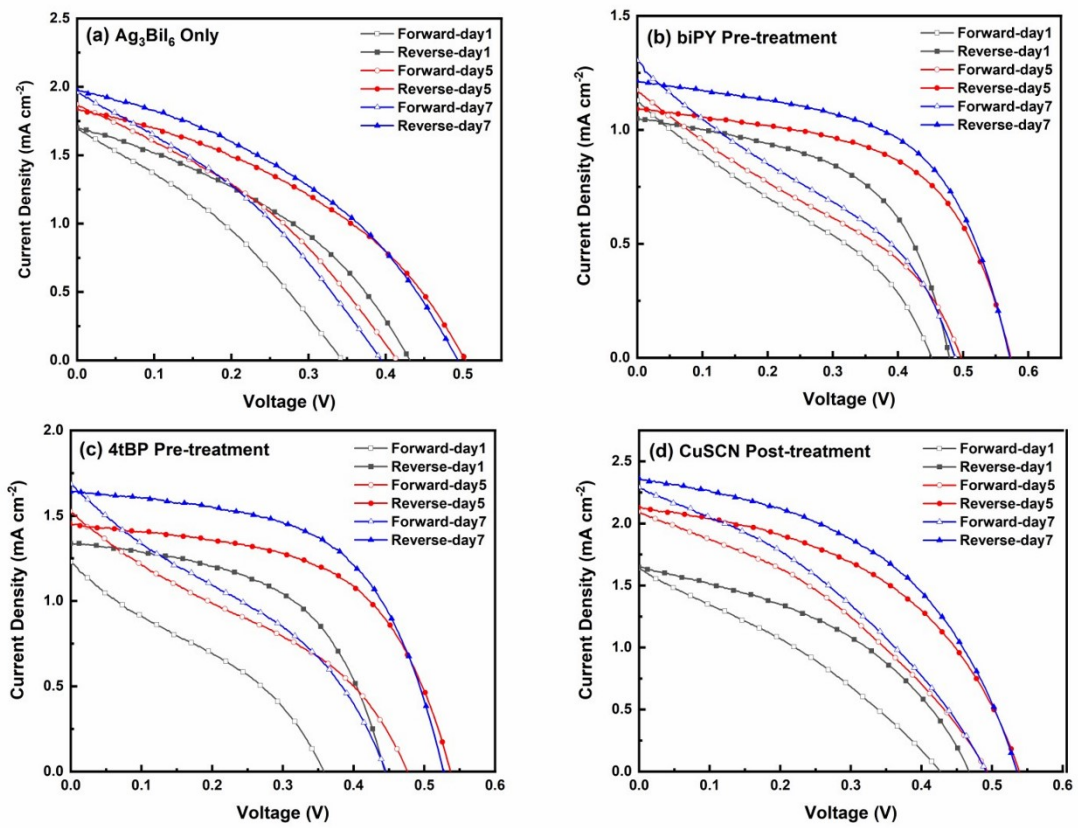

**Figure S7** J-V curves of devices within one-week ageing: (a)  $\text{Ag}_3\text{BiI}_6$  only, (b) biPY pre-treatment, (c) 4tBP pre-treatment and (d) CuSCN post-treatment.



**Table S2** J-V characteristics of aged devices.(a) J-V characteristics of Ag<sub>3</sub>BiI<sub>6</sub> devices on day 1,5 and 7.

| Days  | Scan    | $J_{sc}$ [mA·cm <sup>-2</sup> ] | $V_{oc}$ [V]       | FF                 | PCE [%]            | HI            |
|-------|---------|---------------------------------|--------------------|--------------------|--------------------|---------------|
| Day 1 | Forward | 1.69 (1.48 ± 0.28)              | 0.34 (0.34 ± 0.02) | 0.33 (0.31 ± 0.02) | 0.19 (0.16 ± 0.04) | 0.32          |
|       | Reverse | 1.69 (1.50 ± 0.28)              | 0.43 (0.42 ± 0.02) | 0.39 (0.36 ± 0.03) | 0.28 (0.24 ± 0.06) | (0.32 ± 0.04) |
| Day 5 | Forward | 1.87 (1.61 ± 0.24)              | 0.41 (0.39 ± 0.03) | 0.35 (0.33 ± 0.03) | 0.27 (0.21 ± 0.06) | 0.25          |
|       | Reverse | 1.83 (1.62 ± 0.24)              | 0.50 (0.48 ± 0.05) | 0.40 (0.37 ± 0.03) | 0.36 (0.30 ± 0.08) | (0.28 ± 0.03) |
| Day 7 | Forward | 1.95 (1.75 ± 0.40)              | 0.39 (0.37 ± 0.05) | 0.34 (0.32 ± 0.03) | 0.26 (0.21 ± 0.08) | 0.32          |
|       | Reverse | 1.97 (1.79 ± 0.36)              | 0.49 (0.49 ± 0.02) | 0.39 (0.35 ± 0.05) | 0.38 (0.32 ± 0.10) | (0.34 ± 0.08) |

(b) J-V characteristics of Ag<sub>3</sub>BiI<sub>6</sub> devices with biPY pre-treatment on day 1,5 and 7.

| Days  | Scan    | $J_{sc}$ [mA·cm <sup>-2</sup> ] | $V_{oc}$ [V]       | FF                 | PCE [%]            | HI            |
|-------|---------|---------------------------------|--------------------|--------------------|--------------------|---------------|
| Day 1 | Forward | 1.12 (1.06 ± 0.16)              | 0.45 (0.44 ± 0.02) | 0.32 (0.31 ± 0.04) | 0.16 (0.14 ± 0.04) | 0.39          |
|       | Reverse | 1.05 (0.99 ± 0.12)              | 0.48 (0.48 ± 0.01) | 0.53 (0.49 ± 0.04) | 0.27 (0.23 ± 0.02) | (0.38 ± 0.13) |
| Day 5 | Forward | 1.17 (1.01 ± 0.12)              | 0.50 (0.48 ± 0.01) | 0.32 (0.31 ± 0.02) | 0.19 (0.15 ± 0.03) | 0.46          |
|       | Reverse | 1.09 (0.96 ± 0.09)              | 0.57 (0.57 ± 0.01) | 0.56 (0.50 ± 0.07) | 0.35 (0.27 ± 0.05) | (0.43 ± 0.10) |
| Day 7 | Forward | 1.30 (1.12 ± 0.12)              | 0.49 (0.47 ± 0.02) | 0.33 (0.33 ± 0.01) | 0.21 (0.17 ± 0.03) | 0.46          |
|       | Reverse | 1.21 (1.07 ± 0.10)              | 0.57 (0.57 ± 0.01) | 0.56 (0.50 ± 0.06) | 0.39 (0.30 ± 0.05) | (0.42 ± 0.07) |

(c) J-V characteristics of Ag<sub>3</sub>BiI<sub>6</sub> devices with 4-tBP pre-treatment on day 1,5 and 7.

| Days  | Scan    | $J_{sc}$ [mA·cm <sup>-2</sup> ] | $V_{oc}$ [V]       | FF                 | PCE [%]            | HI            |
|-------|---------|---------------------------------|--------------------|--------------------|--------------------|---------------|
| Day 1 | Forward | 1.22 (1.16 ± 0.20)              | 0.36 (0.36 ± 0.04) | 0.33 (0.32 ± 0.04) | 0.14 (0.13 ± 0.03) | 0.55          |
|       | Reverse | 1.34 (1.23 ± 0.28)              | 0.44 (0.44 ± 0.01) | 0.53 (0.46 ± 0.07) | 0.32 (0.24 ± 0.05) | (0.44 ± 0.14) |
| Day 5 | Forward | 1.52 (1.33 ± 0.28)              | 0.47 (0.45 ± 0.03) | 0.33 (0.33 ± 0.02) | 0.24 (0.19 ± 0.03) | 0.45          |
|       | Reverse | 1.45 (1.31 ± 0.28)              | 0.54 (0.51 ± 0.02) | 0.56 (0.45 ± 0.09) | 0.44 (0.30 ± 0.09) | (0.33 ± 0.15) |
| Day 7 | Forward | 1.68 (1.33 ± 0.26)              | 0.44 (0.42 ± 0.03) | 0.34 (0.34 ± 0.03) | 0.25 (0.19 ± 0.04) | 0.48          |
|       | Reverse | 1.64 (1.33 ± 0.27)              | 0.52 (0.51 ± 0.02) | 0.57 (0.46 ± 0.09) | 0.49 (0.31 ± 0.11) | (0.37 ± 0.10) |

(d) J-V characteristics of Ag<sub>3</sub>BiI<sub>6</sub> devices with CuSCN post-treatment within 28 days.

| Days   | Scan    | $J_{sc}$ [mA·cm <sup>-2</sup> ] | $V_{oc}$ [V]       | FF                 | PCE [%]            | HI            |
|--------|---------|---------------------------------|--------------------|--------------------|--------------------|---------------|
| Day 1  | Forward | 1.63 (1.47 ± 0.21)              | 0.43 (0.40 ± 0.02) | 0.32 (0.34 ± 0.05) | 0.22 (0.20 ± 0.04) | 0.31          |
|        | Reverse | 1.65 (1.46 ± 0.21)              | 0.47 (0.46 ± 0.01) | 0.42 (0.43 ± 0.04) | 0.33 (0.29 ± 0.05) | (0.30 ± 0.06) |
| Day 5  | Forward | 2.09 (1.90 ± 0.33)              | 0.49 (0.45 ± 0.04) | 0.36 (0.37 ± 0.05) | 0.38 (0.32 ± 0.06) | 0.30          |
|        | Reverse | 2.13 (1.90 ± 0.38)              | 0.54 (0.51 ± 0.03) | 0.47 (0.47 ± 0.05) | 0.53 (0.45 ± 0.05) | (0.30 ± 0.09) |
| Day 7  | Forward | 2.28 (2.16 ± 0.53)              | 0.49 (0.45 ± 0.03) | 0.36 (0.37 ± 0.04) | 0.40 (0.35 ± 0.07) | 0.32          |
|        | Reverse | 2.35 (2.17 ± 0.62)              | 0.53 (0.51 ± 0.02) | 0.47 (0.48 ± 0.05) | 0.60 (0.52 ± 0.09) | (0.32 ± 0.07) |
| Day 14 | Forward | 2.06 (2.04 ± 0.58)              | 0.50 (0.48 ± 0.04) | 0.39 (0.39 ± 0.06) | 0.40 (0.38 ± 0.13) | 0.26          |
|        | Reverse | 2.10 (2.02 ± 0.61)              | 0.54 (0.52 ± 0.03) | 0.48 (0.49 ± 0.05) | 0.55 (0.50 ± 0.13) | (0.25 ± 0.09) |
| Day 21 | Forward | 2.22 (2.14 ± 0.54)              | 0.51 (0.49 ± 0.05) | 0.39 (0.39 ± 0.06) | 0.44 (0.41 ± 0.12) | 0.26          |
|        | Reverse | 2.27 (2.12 ± 0.60)              | 0.54 (0.53 ± 0.03) | 0.48 (0.48 ± 0.05) | 0.59 (0.54 ± 0.11) | (0.24 ± 0.12) |
| Day 28 | Forward | 2.74 (2.31 ± 0.76)              | 0.53 (0.49 ± 0.05) | 0.37 (0.38 ± 0.06) | 0.54 (0.43 ± 0.14) | 0.27          |
|        | Reverse | 2.78 (2.30 ± 0.81)              | 0.56 (0.54 ± 0.03) | 0.48 (0.49 ± 0.05) | 0.74 (0.59 ± 0.15) | (0.28 ± 0.09) |

The average results in bracket were calculated from 5 individual devices for each type.

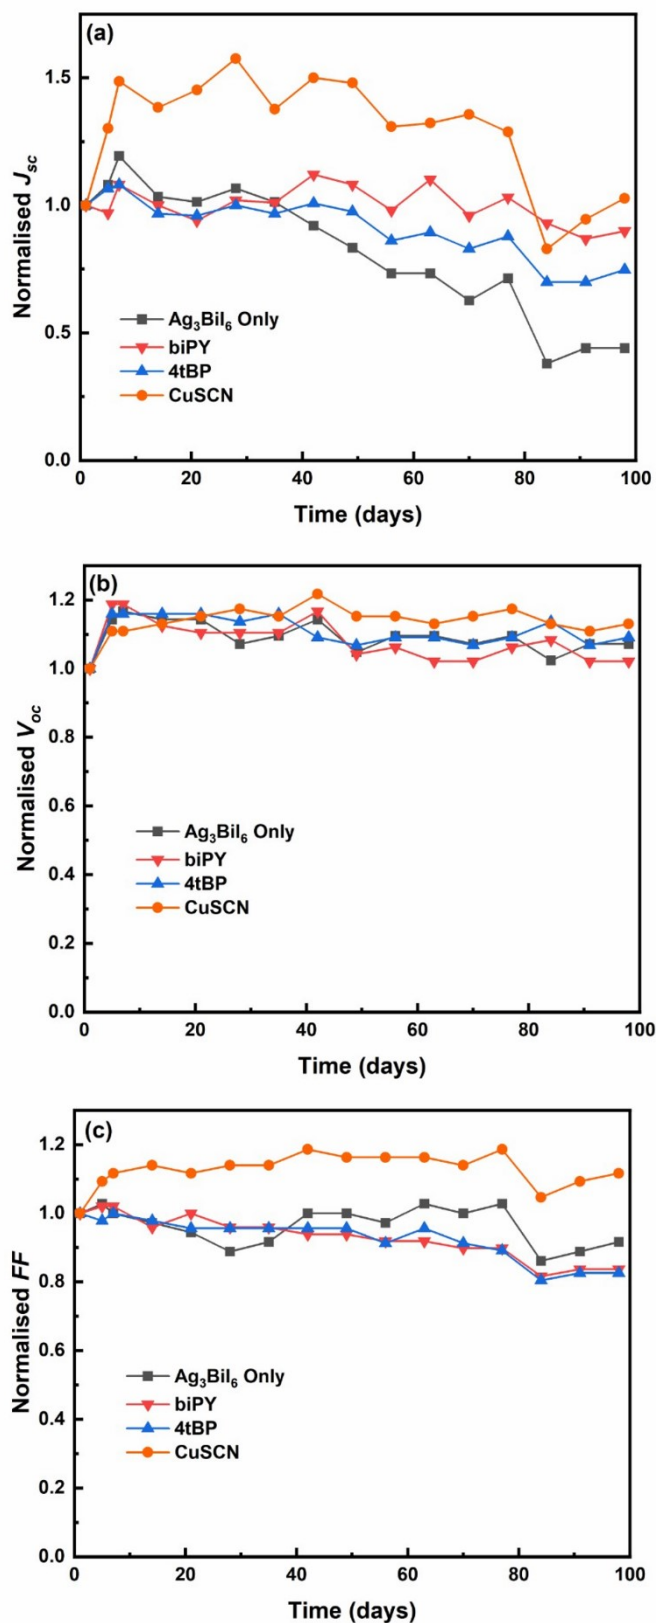

**Figure S8** Dark storage stability (reverse scan) of  $\text{Ag}_3\text{BiI}_6$  device regarding (a)  $J_{sc}$ , (b)  $V_{oc}$  and (c)  $FF$  in atmosphere.

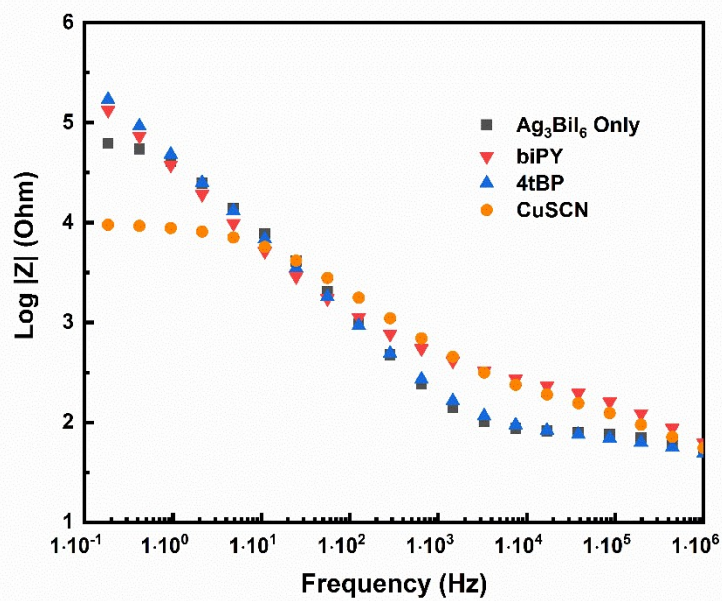

**Figure S9** Bode plots of  $\text{Ag}_3\text{BiI}_6$  TM-SCs with different treatment at 450 mV under dark.

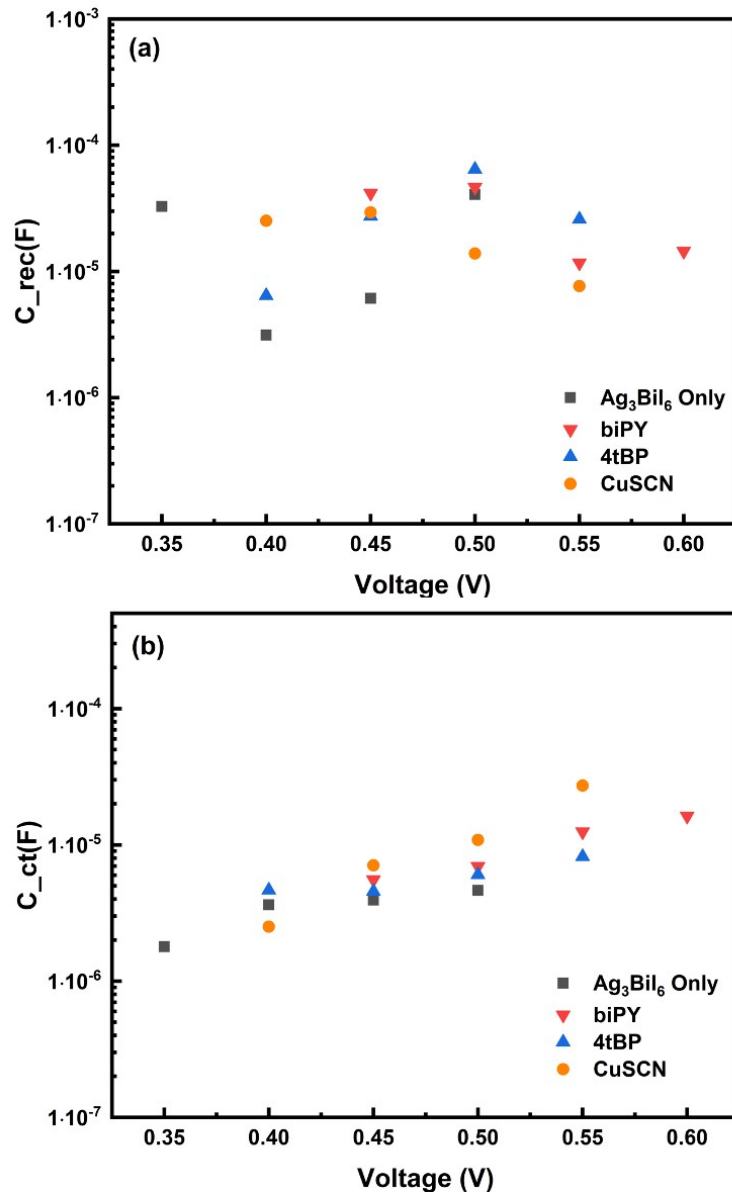

**Figure S10** Values of extracted resistance of (a)  $C_{rec}$  and (b)  $C_{ct}$  obtained from EIS of  $Ag_3Bil_6$  devices at given bias under dark.
